# Supplementary material for: Primary care-based interventions addressing social isolation and loneliness in older people: a scoping review
Source: PubMed Central journal article supplement — BMJ Open. 2022 Feb 4;12(2):e057729. doi: 10.1136/bmjopen-2021-057729 (PMC8819903; doi:10.1136/bmjopen-2021-057729), 2022-02-04
Supplement: bmjopen-2021-057729supp001.pdf [file bmjopen-2021-057729supp001.pdf]

## Supplementary material 1. Complete original search strategy MEDLINE and translated searches for EMBASE, CINAHL, COCHRANE

### Search strategy MEDLINE

---

**Concept 1: loneliness and social isolation**

---

1.Loneliness/

2.Social Isolation/

3.(loneliness or living lonely or living alone or lonely).tw,kf.

4.(social adj2 (alienat\* or isolat\* or exclu\*)).tw,kf.

5. 1 OR 2 OR 3 OR 4

---

**Concept 2: Primary and community care**

---

6.exp Primary Health Care/

7.exp Community Health Services/

8.exp ambulatory care facilities/

9.exp ambulatory care/

10.exp home care services/

11.(primary care or primary healthcare or communit\* or integrated care or ambulatory care or social work\* or home care or mental health service\* or domiciliary).tw,kf.

12.family practice/

13.nurse practitioners/

14.family physician/

15.community health nursing/

16.exp social work/

17.Family Nursing/

18.General Practitioners/

19.((primary or community) adj2 (provider\* or professional\* or clinician\* or physician\* or doctor\* or nurs\* or psychiatrist or practitioner\*)).tw,kf.

20.(Social work\* or family medicine or family practice or GP or family care team or family team).tw,kf.

21. 6 OR 7 OR 8 OR 9 OR 10 OR 11 OR 12 OR 13 OR 14 OR 15 OR 16 OR 17 OR 18 OR 19 OR 20

---

**Concept 3 Older non-institutionalized adults**

---

22.exp Aged/

23.geriatrics/

24.aging/

25.(older adult\* or community-dwelling elder\* or elder\* or older people or aged or aging or ageing or non-institutionalized or community living individual\* or adult\* or geriatric or old population or chronic\* ill patient\* or chronic\* patient\* or frail elderly).tw,kf.

26. 22 OR 23 OR 24 OR 25

**5 AND 21 AND 26**

---

## Translated search strategy into EMBASE, CINAHL and COCHRANE (Onset -01 June 2021)

### EMBASE

(Loneliness/ or "Social Isolation"/ or (loneliness or "living lonely" or "living alone" or lonely).tw. or ((social adj2 alienat\*) or isolat\* or exclu\*).tw.) **and** (((exp "Primary Health Care"/ or exp "Community Health Services"/ or exp "ambulatory care facilities"/ or exp "ambulatory care"/ or exp "home care services"/ or ("primary care" or "primary healthcare" or communit\* or "integrated care" or "ambulatory care" or "social work\*" or "home care" or "mental health service\*" or domiciliary).tw. or "family practice"/ or "nurse practitioners"/ or "family physician"/ or "community health nursing"/ or exp "social work"/ or "Family Nursing"/ or "General Practitioners"/ or (primary or community).mp.) adj2 (provider\* or professional\* or clinician\* or physician\* or doctor\* or nurs\* or psychiatrist or practitioner\*).tw.) or ("Social work\*" or "family medicine" or "family practice" or GP or "family care team" or "family team").tw.) **and** (exp Aged/ or geriatrics/ or aging/ or ("older adult\*" or "community-dwelling elder\*" or elder\* or "older people" or aged or aging or ageing or non-institutionalized or "community living individual\*" or adult\* or geriatric or "old population" or "chronic\* ill patient\*" or "chronic\* patient\*" or "frail elderly").tw.) [mp=title, abstract, heading word, drug trade name, original title, device manufacturer, drug manufacturer, device trade name, keyword, floating subheading word, candidate term word]

### CINAHL

((MH "Loneliness" OR MH "Social Isolation" OR TI (loneliness OR AB loneliness OR "living lonely" OR AB "living lonely" OR TI "living alone" OR AB "living alone" OR TI lonely OR AB lonely)) **AND** (MH "Primary Health Care" OR MH "Community Health Services" OR MH "ambulatory care facilities" OR MH "ambulatory care" OR MH "home care services" OR TI "primary care" OR AB "primary care") OR (TI "primary healthcare" OR AB "primary healthcare") OR (TI communit\* OR AB communit\*) OR (TI "integrated care" OR AB "integrated care") OR (TI "ambulatory care" OR AB "ambulatory care") OR (TI "social work\*" OR AB "social work\*") OR (TI "home care" OR AB "home care") OR (TI "mental health service\*" OR AB "mental health service\*") OR (TI domiciliary OR AB domiciliary)) OR (MH "family practice") OR (MH "nurse practitioners") OR (MH "family physician") OR (MH "community health nursing") OR (MH "social work"+) OR (MH "Family Nursing") OR (MH "General Practitioners") OR ((TI primary OR AB primary) OR (TI community OR AB community)) N2 ((TI provider\* OR AB provider\*) OR (TI professional\* OR AB professional\*) OR (TI clinician\* OR AB clinician\*) OR (TI physician\* OR AB physician\*) OR (TI doctor\* OR AB doctor\*) OR (TI nurs\* OR AB nurs\*) OR (TI psychiatrist OR AB psychiatrist) OR (TI practitioner\* OR AB practitioner\*)) OR ((TI "Social work\*" OR AB "Social work\*") OR (TI "family medicine" OR AB "family medicine") OR (TI "family practice" OR AB "family practice") OR (TI GP OR AB GP) OR (TI "family care team" OR AB "family care team") OR (TI "family team" OR AB "family team") **AND** ((MH Aged+) OR (MH geriatrics) OR (MH aging) OR ((TI "older adult\*" OR AB "older adult\*") OR (TI "community-dwelling elder\*" OR AB "community-dwelling elder\*") OR (TI elder\* OR AB elder\*) OR (TI "older people" OR AB "older people") OR (TI aged OR AB aged) OR (TI aging OR AB aging) OR (TI ageing OR AB ageing) OR (TI non-institutionalized OR AB non-institutionalized) OR (TI "community living individual\*" OR AB "community living individual\*") OR (TI adult\* OR AB adult\*) OR (TI geriatric OR AB geriatric) OR (TI "old population" OR AB "old population") OR (TI "chronic\* ill patient\*" OR AB "chronic\* ill patient\*") OR (TI "chronic\* patient\*" OR AB "chronic\* patient\*") OR (TI "frail elderly" OR AB "frail elderly"))

### COCHRANE

((((mh Loneliness):ti,ab,kw OR (mh "Social Isolation"):ti,ab,kw OR (loneliness OR "living lonely" OR lonely):ti,ab,kw OR (social NEAR/2 alienat\* OR isolat\* OR exclu\*):ti,ab,kw)) **AND** (((mh "Primary Health Care" OR mh "Community Health Services" OR mh "ambulatory care facilities" OR mh "ambulatory care" OR mh "home care services" OR ("primary care":ti,ab OR "primary healthcare":ti,ab OR communit\*:ti,ab OR "integrated care":ti,ab OR "ambulatory care":ti,ab OR ("social" NEXT work\*):ti,ab OR "home care":ti,ab OR ("mental health" NEXT service\*):ti,ab OR domiciliary:ti,ab) OR mh "family practice" OR mh "nurse practitioners" OR mh "family physician" OR mh "community health nursing" OR mh "social work" OR mh "Family Nursing" OR mh "General Practitioners" OR ((primary:ti,ab OR community:ti,ab) NEAR/2 (provider\*:ti,ab OR professional\*:ti,ab OR clinician\*:ti,ab OR physician\*:ti,ab OR doctor\*:ti,ab OR nurs\*:ti,ab OR psychiatrist:ti,ab OR practitioner\*:ti,ab)) OR ((("Social" NEXT work\*):ti,ab OR "family medicine":ti,ab OR "family practice":ti,ab OR GP:ti,ab OR "family care team":ti,ab OR "family team":ti,ab))) **AND** ((mh Aged OR mh geriatrics OR mh aging OR ("older" NEXT adult\*):ti,ab OR ("community-dwelling" NEXT elder\*):ti,ab OR elder\*:ti,ab OR "older people":ti,ab OR aged:ti,ab OR ageing:ti,ab OR non-institutionalized:ti,ab OR ("community living" NEXT individual\*):ti,ab OR adult\*:ti,ab OR geriatric:ti,ab OR "old population":ti,ab OR (chronic\* NEXT "ill" NEXT patient\*):ti,ab OR (chronic\* NEXT patient\*):ti,ab OR "frail elderly":ti,ab)))
